# Supplementary material for: Clarifying the impacts of surface hydroxyls on CO oxidation on CeO2(100) surfaces: a DFT+U study
Source: Royal Society of Chemistry journal article supplement (doi:10.1039/d0cp00204f), 2020-01-01
Supplement: d0cp00204f1.pdf [file d0cp00204f1.pdf]

## Supplementary Information

### Clarifying the Impacts of Surface Hydroxyls on CO Oxidation on the CeO<sub>2</sub>(100) Surfaces: A DFT+U Study

Hui Zhou, Dong Wang\* and Xue-Qing Gong\*

Key Laboratory for Advanced Materials, Centre for Computational Chemistry and Research  
Institute of Industrial Catalysis, School of Chemistry & Molecular Engineering, East China  
University of Science and Technology, 130 Meilong Road, Shanghai 200237, P.R. China

\*E-mail: [wangd@ecust.edu.cn](mailto:wangd@ecust.edu.cn); [xgong@ecust.edu.cn](mailto:xgong@ecust.edu.cn)

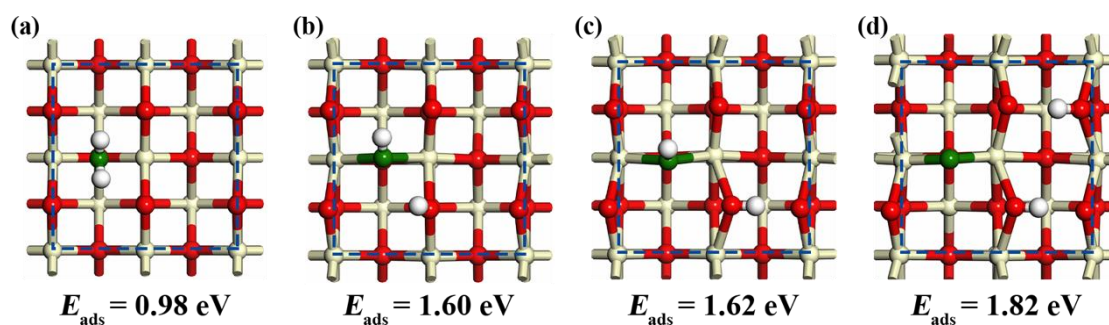

**Figure S1.** Calculated structures and adsorption energies of H<sub>2</sub>O on the O-t CeO<sub>2</sub>(100) surface.

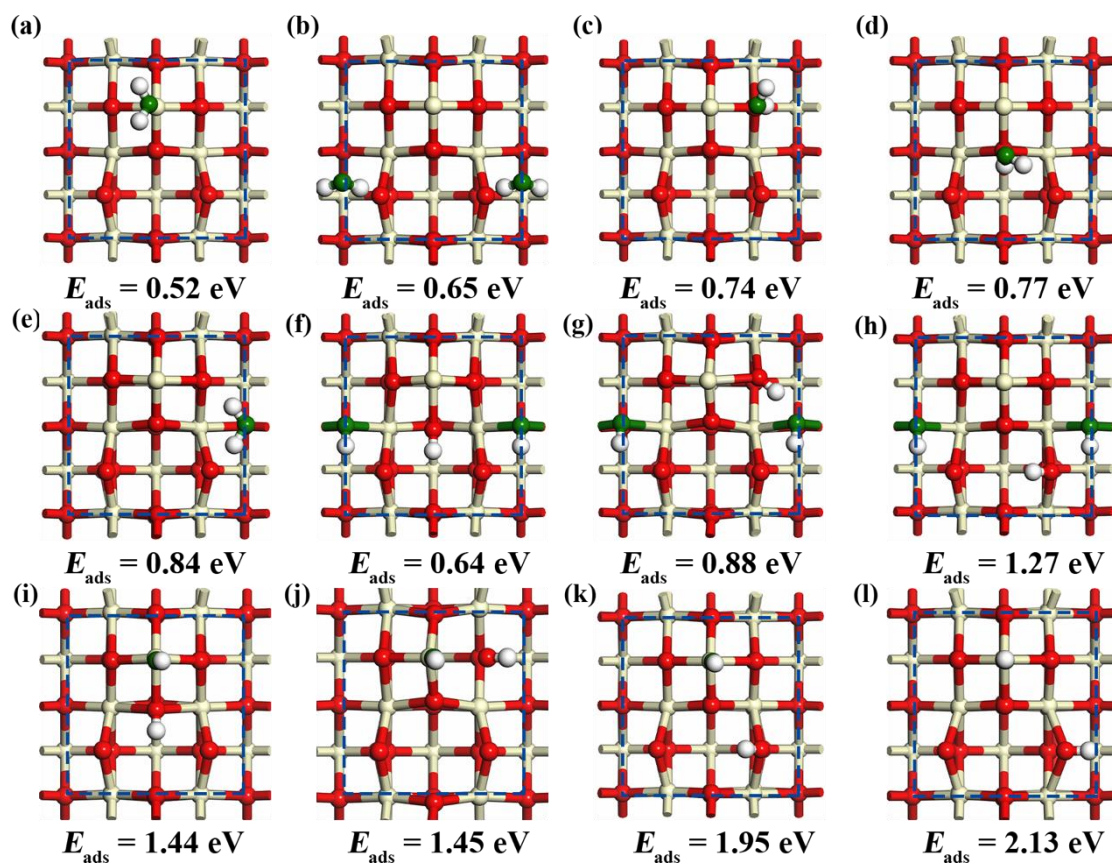

**Figure S2.** Calculated structures and adsorption energies of  $\text{H}_2\text{O}$  on the  $\text{CeO}_4\text{-t}$   $\text{CeO}_2(100)$  surface.

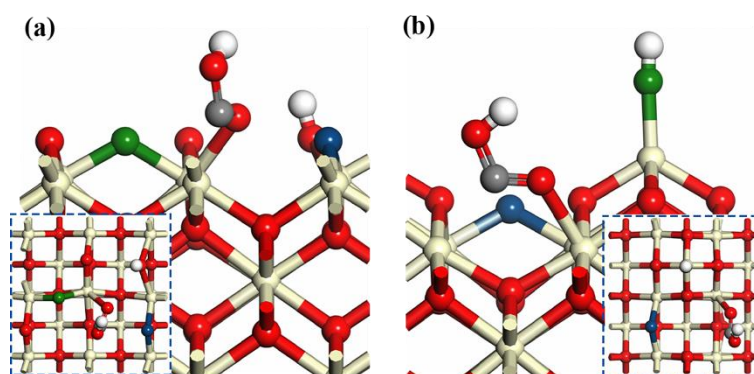

**Figure S3.** Side views of the calculated structures of adsorbed carboxyl (COOH) on the hydroxylated O-t (a) and  $\text{CeO}_4\text{-t}$  (b) surfaces, where the corresponding top views are also given in the inset.

**Table S1.** Calculated formation energies of the carboxyl (COOH) species relative to the adsorbed CO on the hydroxylated O-t and  $\text{CeO}_4\text{-t}$  surfaces. Negative  $E_{\text{form}}$  values indicate that the formation of COOH is endothermic.

| Items                   | $E_{\text{ads}}(\text{CO}) / \text{eV}$ | $E_{\text{form}}(\text{COOH}) / \text{eV}$ | Structure  |
|-------------------------|-----------------------------------------|--------------------------------------------|------------|
| O-t                     | 0.42                                    | -0.71                                      | Figure S3a |
| $\text{CeO}_4\text{-t}$ | 0.06                                    | -0.46                                      | Figure S3b |

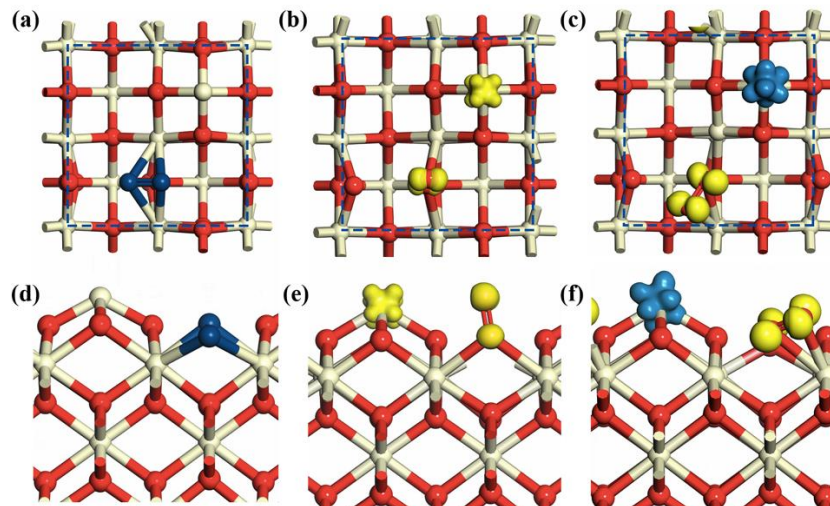

**Figure S4.** Calculated spin-polarized charge densities (top and side views) of the peroxide (a, d) and superoxide species (b, e for the end-on while c, f for the side-on configuration) being adsorbed at the  $O_v$  site on the  $CeO_4$ -t surface. Spin-up and down densities are colored in yellow and blue at the iso-surface of  $0.01 |e|/\text{Bohr}^3$ .

**Table S2.** Calculated adsorption energies ( $E_{\text{ads}}$ ), Bader charges, and O-O bond lengths of the peroxide ( $O_2^{2-}$ ) or superoxide ( $O_2^-$ ) species being adsorbed at the  $O_v$  site on the  $CeO_4$ -t surface. Positive  $E_{\text{ads}}$  values indicate exothermic  $O_2$  adsorption processes.

| Species                         | $E_{\text{ads}}$<br>/ eV | Bader charge<br>/  e | O-O bond length<br>/ Å |
|---------------------------------|--------------------------|----------------------|------------------------|
| peroxide ( $O_2^{2-}$ )         | 0.87                     | -1.173               | 1.455                  |
| superoxide ( $O_2^-$ , end-on)  | 0.58                     | -0.689               | 1.325                  |
| superoxide ( $O_2^-$ , side-on) | 0.86                     | -0.699               | 1.335                  |

As seen in Figure S4 and Table S2, we calculated and compared the adsorption energies, Bader charges, O-O bond lengths, and spin-polarized charge densities, about the adsorbed superoxide and peroxide species on the  $CeO_4$ -t surface. It was found that, i) the peroxide  $O_2^{2-}$  favors to anchor at the  $O_v$  site via both of O atoms (Figure S4a), forming a side-on geometry with elongated O-O bond length of 1.455 Å; ii) the superoxide  $O_2^-$  has two adsorption configurations of the end-on (Figure S4e) and side-on (Figure S4f) structures depending on the number of O involved in binding the vacancy, and the latter is thermodynamically more stable, albeit their comparable O-O bond lengths.

Since the calculated adsorption energies (0.87 vs. 0.86 eV; Table S2) and structures (side-on configuration) are quite similar for the peroxide and superoxide species, it is seemingly difficult to control these two types of adsorption on the  $CeO_4$ -t surface. However, spin-polarized charge density analysis in Figure S4 shows that the key for the

$O_2^-/O_2^-$  formation lies in whether the second electron is captured by the pre-formed  $O_2^-$  (i.e. the peroxide pathway) or by a surface protruding  $Ce_{4c}$  cation (i.e. the superoxide pathway). This was further confirmed from calculated Bader charges in Table S2. Therefore, our results indicate a possible strategy to alter the peroxide/superoxide formation by suppressing/promoting the ability of surface  $Ce_{4c}$  in trapping electrons.

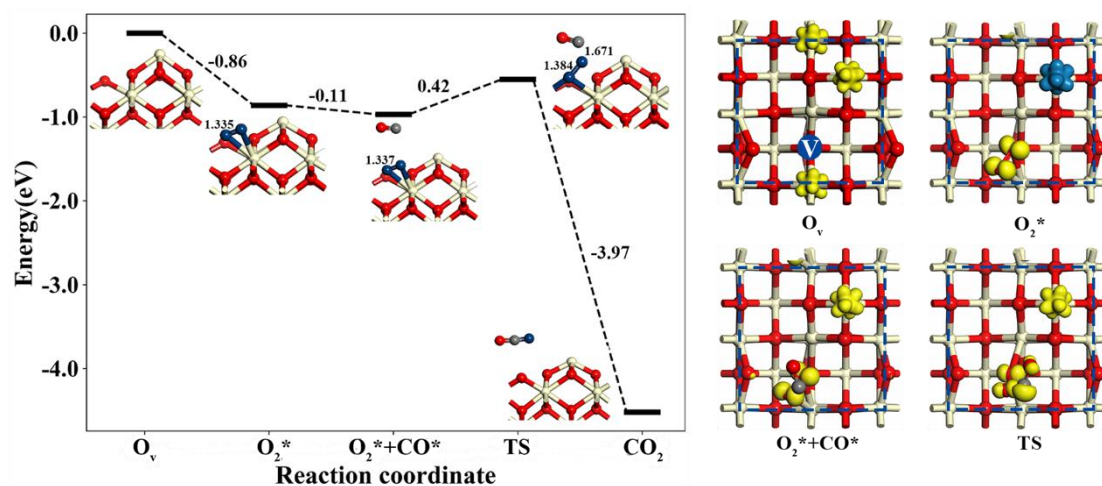

**Figure S5.** Calculated energy profile and key structures of CO oxidation in the stage II via the superoxide  $O_2^-$  pathway. The corresponding electronic structures (localized electrons) of the key intermediates are also presented. Unit of bond distance: Å.
